# Supplementary material
Source: MDPI journal article supplement (https://www.mdpi.com/2227-9040/11/1/12)
Supplement: s1 [file s1]

**Supplementary Materials**  
to the article of Michail Sorvin, Guzeliya Galimzyanova, Vladimir Evtugyn,  
Alexey Ivanov, Dmitry Shurpik, Ivan Stoikov, Gennady Evtugyn  
“Potentiometric Sensor Based on Layered Pillar[6]arene - Copper Composite”

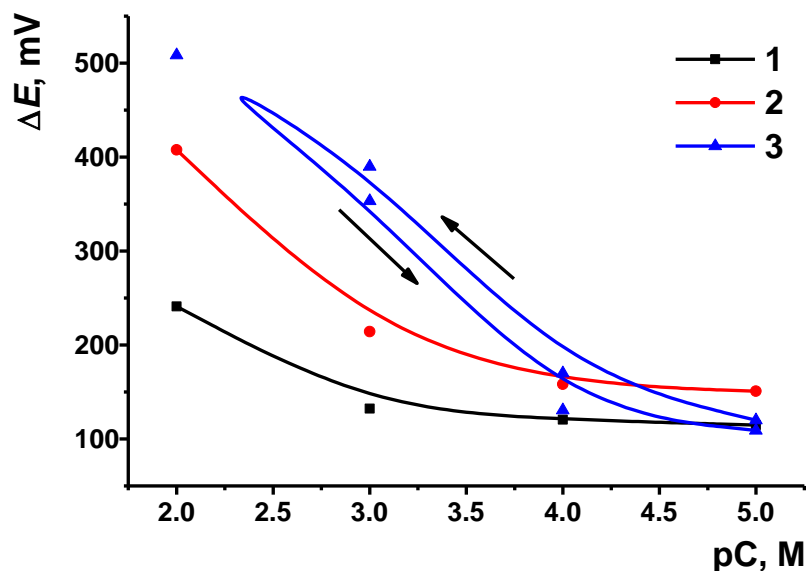

**Figure S1.** The dependence of the sensor signal on the concentration of  $\text{FeCl}_3$  recorded with the GCE covered with polyaniline and 1.0 mM P[6]A. 1 – P[6]A aliquot 4  $\mu\text{L}$ , Britton-Robinson buffer, pH = 4.5; 2 - polyaniline with no P[6]A, Britton-Robinson buffer, pH = 4.5; 3 - P[6]A aliquot 4  $\mu\text{L}$ , 0.1 M NaCl. Arrows indicate the direction of the concentration change

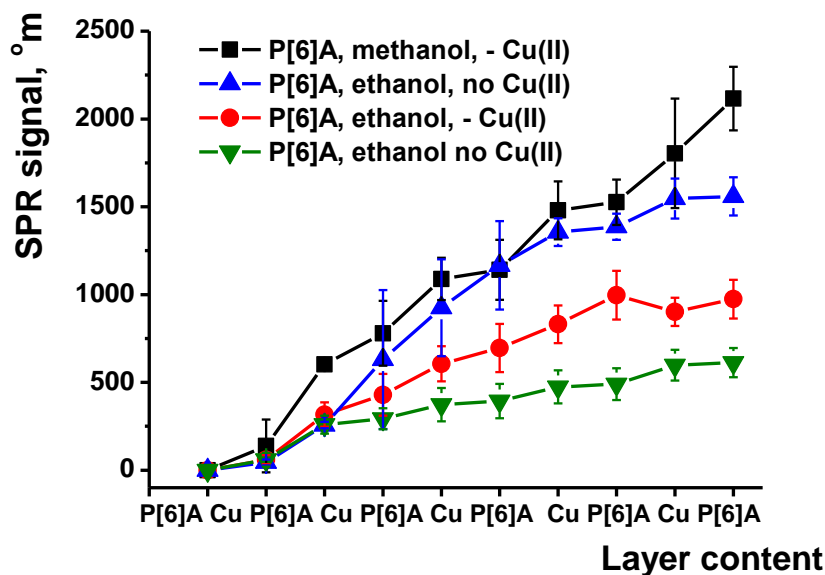

**Figure S2.** The dependence of the SPR signal on the addition of 1.0 mM P[6]A in ethanol and methanol and 1.0 mM  $\text{CuCl}_2$  in deionized water, SPR chip modified with the MUC, PSS and PAA. Average  $\pm$  s.d. for three replications

**Table S1.** Concentrations of CuCl<sub>2</sub> solution used for dynamic response assessment (legend to Figure 3(b))

| Aliquot Number | Total CuCl <sub>2</sub> concentration, M | Aliquot Number | Total CuCl <sub>2</sub> concentration, M |
|----------------|------------------------------------------|----------------|------------------------------------------|
| 1              | $1 \times 10^{-7}$                       | 9              | $5 \times 10^{-5}$                       |
| 2              | $2 \times 10^{-7}$                       | 10             | $2 \times 10^{-4}$                       |
| 3              | $5 \times 10^{-7}$                       | 11             | $5 \times 10^{-4}$                       |
| 4              | $1 \times 10^{-6}$                       | 12             | $1 \times 10^{-4}$                       |
| 5              | $2 \times 10^{-6}$                       | 13             | $1 \times 10^{-3}$                       |
| 6              | $5 \times 10^{-6}$                       | 14             | $2 \times 10^{-3}$                       |
| 7              | $1 \times 10^{-5}$                       | 15             | $5 \times 10^{-3}$                       |
| 8              | $2 \times 10^{-5}$                       | 16             | $1 \times 10^{-2}$                       |

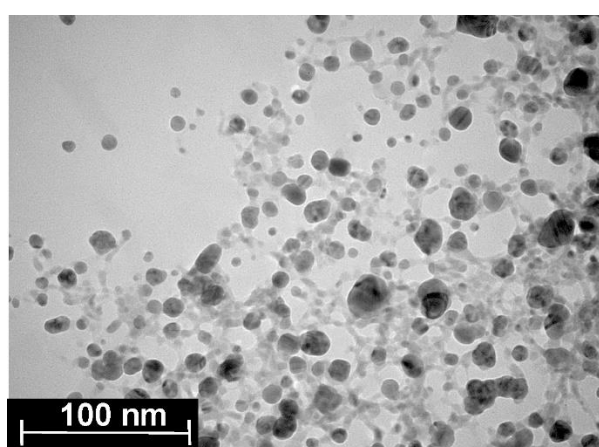

(a)

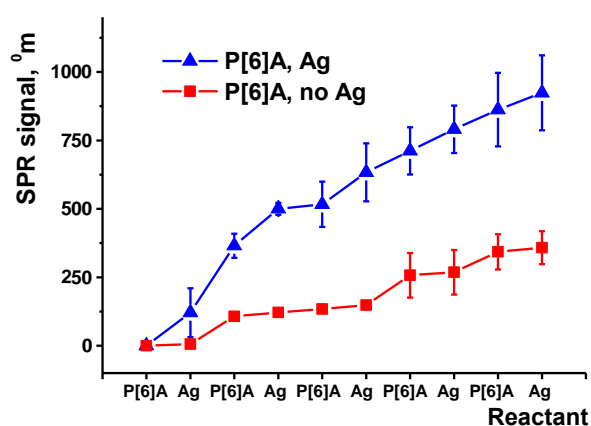

(b)

**Figure S3.** (a) TEM image of the P[6]A – Ag<sup>+</sup> mixture, formvar/carbon supported copper grids 200 mesh (b) The dependence of the SPR signal on the addition of 1.0 mM P[6]A in ethanol and 1.0 mM AgNO<sub>3</sub> in deionized water, SPR chip modified with the MUC, PSS and PDPA. Average  $\pm$  s.d. for three replications
